# Supplementary material for: Orion: Detecting regions of the human non-coding genome that are intolerant to variation using population genetics
Source: PLOS journal article supplement (doi:10.1371/journal.pone.0181604), 2017-08-10

# Distribution of the Number of Variants within Sliding Windows

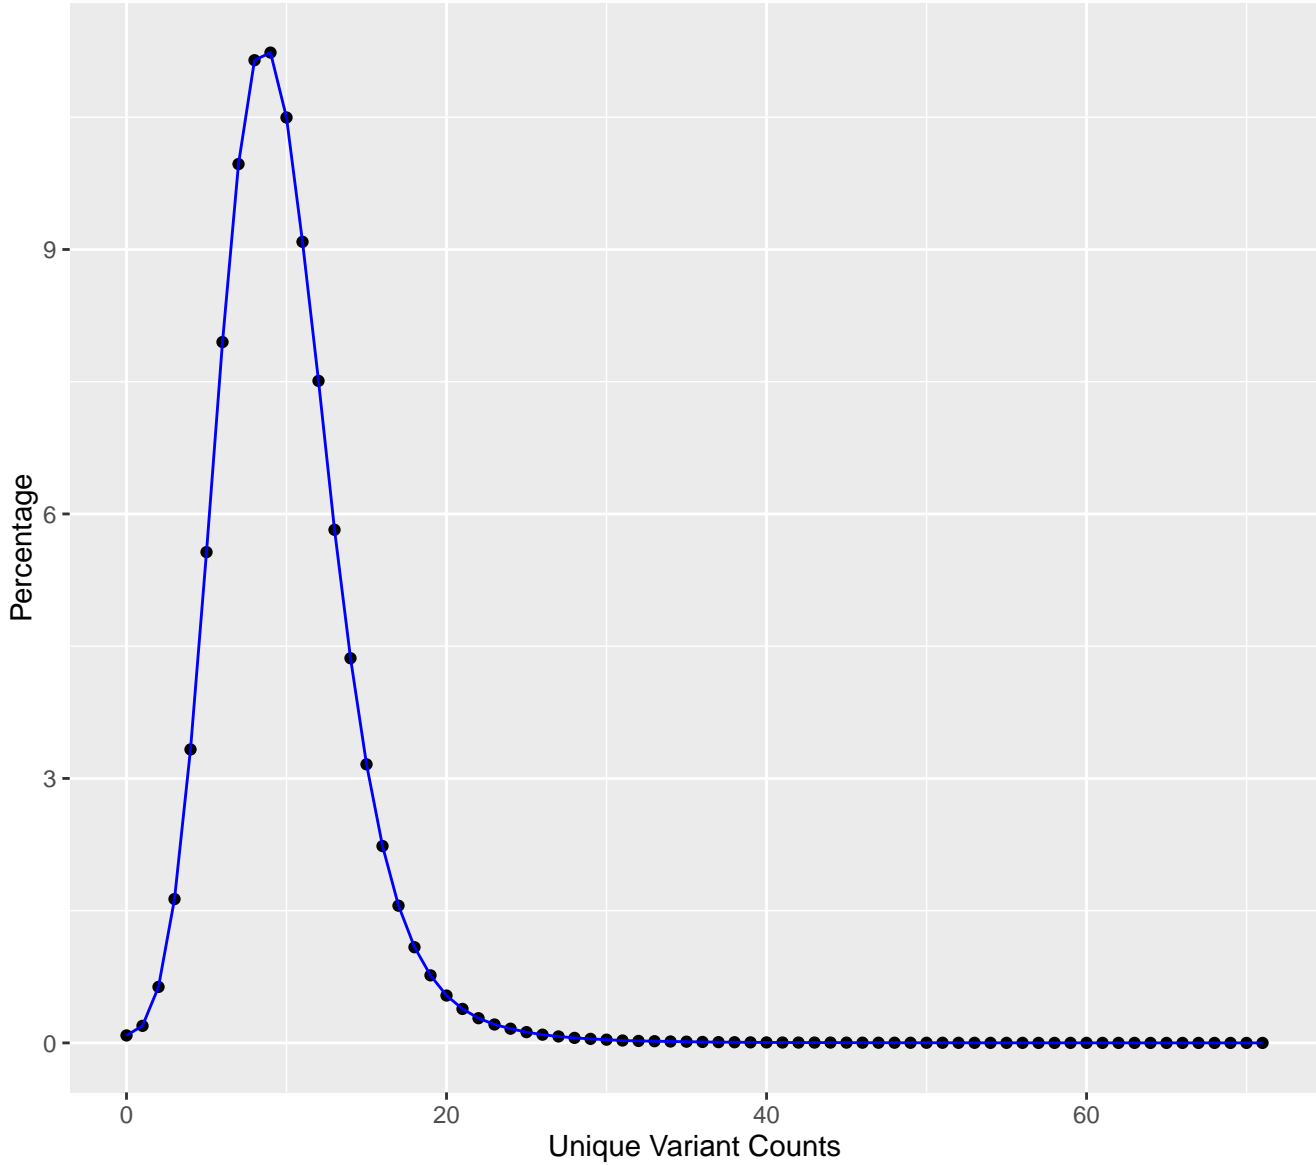

Supplement: S3 (10.1371/journal.pone.0181604.s003) [file journal.pone.0181604.s003]
